# Supplementary material for: A superhydrophobic poly(lactic acid) electrospun nanofibrous membrane surface-functionalized with TiO2 nanoparticles and methyltrichlorosilane for oil/water separation and dye adsorption
Source: Royal Society of Chemistry journal article supplement (doi:10.1039/c9nj03576a), 2019-01-01
Supplement: c9nj03576a1.pdf [file c9nj03576a1.pdf]

**Electronic Supplementary Information for:**

**Superhydrophobic poly(lactic acid) electrospun nanofibrous membrane surface-  
functionalized with TiO<sub>2</sub> nanoparticles and methyltrichlorosilane for oil/water  
separation and dye adsorption**

Zixuan Zhou, Lejing Liu, Weizhong Yuan\*

*Shanghai Tenth People's Hospital, School of Medicine, School of Materials Science  
and Engineering, Tongji University, Shanghai 201804, People's Republic of China.*

*E-mail: yuanwz@tongji.edu.cn (W. Yuan). Tel: +86 21 69580234, Fax: +86 21*

*69584723*

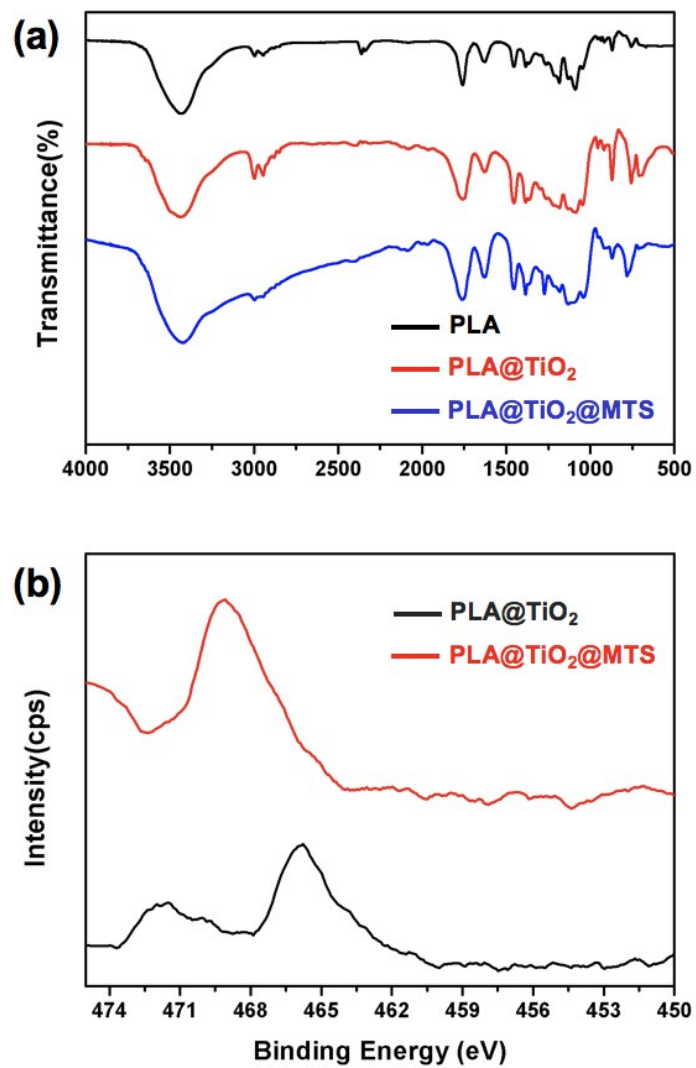

**Fig. S1** (a) FT-IR spectra of PLA, PLA@TiO<sub>2</sub>, PLA@TiO<sub>2</sub>@MTS, and (b) X-ray photoelectron spectroscopy (XPS) of titanium.

**Table S1** The relationship between the permeate flux and the thickness of the membrane.

| Type of oil      | The thickness of the membrane (nm) | The permeate flux (Lm <sup>2</sup> h <sup>-1</sup> ) |
|------------------|------------------------------------|------------------------------------------------------|
| soybean oil      | 150                                | 406.9±68.7                                           |
|                  | 180                                | 517.1±93.2                                           |
|                  | 200                                | 608.3±57.7                                           |
| <i>n</i> -hexane | 150                                | 1837.8±35.9                                          |
|                  | 180                                | 2297.6±51.6                                          |
|                  | 200                                | 2499.8±47.6                                          |

The relationship between film thickness and flux is:

$$J = (\varepsilon \pi r_p^2 \Delta p) / 8 \mu L$$

where  $J$  is the permeation flux,  $\varepsilon$  is the porosity of the medium,  $r_p$  is the effective pore radius,  $\Delta p$  is the pressure,  $\mu$  is the viscosity of the liquid, and  $L$  is the thickness of the membrane.

**Table S2** Comparison of oil-water separation efficiency of different materials.

| Oil-water separation material                                                           | Oil-water separation efficiency (%) | Reference |
|-----------------------------------------------------------------------------------------|-------------------------------------|-----------|
| PLA@TiO <sub>2</sub> @MTS<br>electrospun nanofiber<br>membrane (this work)              | 98.4                                | Ref. 1    |
| LDH/cellulose membrane                                                                  | 95                                  |           |
| Filter paper coated with<br>polystyrene grain,<br>polyethylene terephthalate,<br>silica | >96                                 | Ref. 2    |
| Melamine sponge coated with<br>chitosan-sodium                                          | 96                                  | Ref. 3    |

**Table S3** Comparison of adsorption of methylene blue by different materials.

| MB adsorption Material                                                             | The adsorption capacity of MB<br>(mg/g) | Reference |
|------------------------------------------------------------------------------------|-----------------------------------------|-----------|
| PLA@TiO <sub>2</sub> @MTS electrospun<br>nanofiber membrane (this work)            | 236.25                                  |           |
| Crosslinked sericin/β-<br>cyclodextrin/poly(vinyl alcohol)<br>composite nanofibers | 187.97                                  | Ref. 4    |
| MOF/graphite oxide hybrid<br>material                                              | 183.49                                  | Ref. 5    |
| PU/10GO electrospun<br>membrane                                                    | 109.8                                   | Ref. 6    |

We used the formula (1) to conduct a comparison test of methylene blue adsorption capacity:

$$q_t = \frac{C_0 - C_e}{m} V \quad (1)$$

where C<sub>0</sub> is the initial and C<sub>e</sub> is the equilibrium concentration of MB in mg/L, m is the adsorbent mass in g and V is the volume of MB solution in L.

## References

- 1 X. Yue, J. Li, T. Zhang, F. Qiu, D. Yang and M. Xue, In situ one-step fabrication of durable superhydrophobic-superoleophilic cellulose/LDH membrane with hierarchical structure for efficiency oil/water separation, *Chem. Eng. J.* 2017, 328, 117-123.

- 2 S. Wang, M. Li and Q. Lu, Filter Paper with Selective Absorption and Separation of Liquids that Differ in Surface Tension, *ACS Appl. Mater. Interfaces* 2010, 2, 677-683.
- 3 C. Su, H. Yang, S. Song, B. Lu and R. Chen, A magnetic superhydrophilic/oleophobic sponge for continuous oil-water separation, *Chem. Eng. J.* 2017, 309, 366-373.
- 4 R. Zhao, Y. Wang, X. Li, B. Sun and C. Wang, Synthesis of beta-Cyclodextrin-Based Electrospun Nanofiber Membranes for Highly Efficient Adsorption and Separation of Methylene Blue, *ACS Appl. Mater. Interfaces* 2015, 7, 26649-26657.
- 5 L. Li, X.L. Liu, H.Y. Geng, B. Hu, G.W. Song and Z.S. Xu, A MOF/graphite oxide hybrid (MOF: HKUST-1) material for the adsorption of methylene blue from aqueous solution, *J. Mater. Chem. A* 2013, 1, 10292-10299.
- 6 S.P. Sundaran, C.R. Reshmi, P. Sagitha, O. Manaf and A. Sujith, Multifunctional graphene oxide loaded nanofibrous membrane for removal of dyes and coliform from water, *J. Environ. Manage.* 2019, 240, 494-503.
